# Supplementary material for: Predictive role of microRNA-related genetic polymorphisms in the pathological complete response to neoadjuvant chemoradiotherapy in locally advanced rectal cancer patients
Source: PubMed Central journal article supplement (PMC4991418; doi:10.18632/oncotarget.7757), 2016-02-26
Supplement: oncotarget-07-19781-s001.pdf [file oncotarget-07-19781-s001.pdf]

# Predictive role of microRNA-related genetic polymorphisms in the pathological complete response to neoadjuvant chemoradiotherapy in locally advanced rectal cancer patients

## Supplementary Material

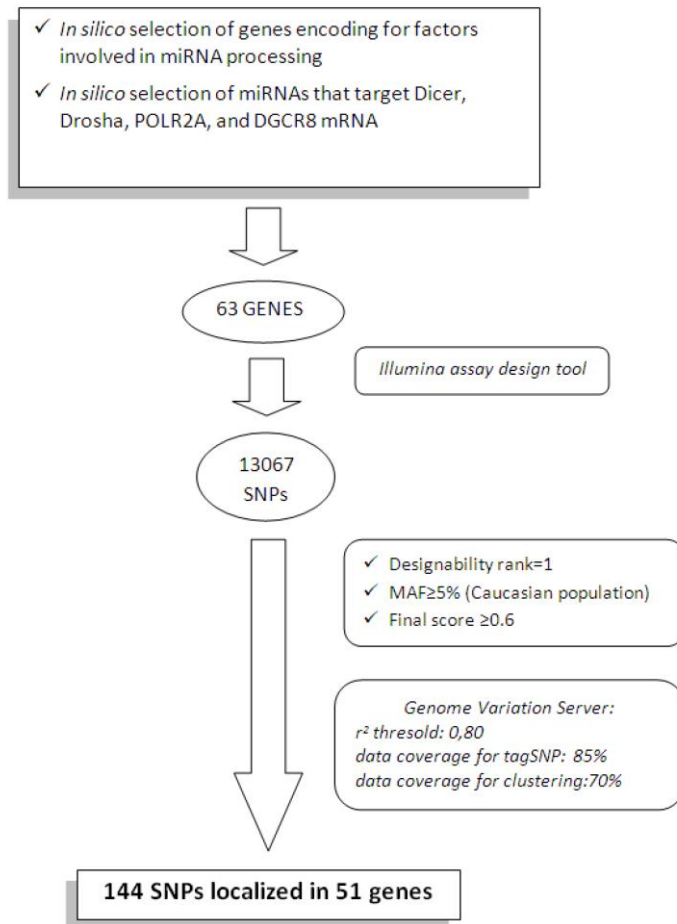

**Supplementary Figure 1:** Flow chart of SNPs selection.

SNP, single nucleotide polymorphism; MAF, minor allele frequency.
